# Supplementary material for: Serum vitamin K1 associated to microangiopathy and/or macroangiopathy in individuals with and without diabetes
Source: PubMed Central journal article supplement — BMJ Open Diabetes Res Care. 2020 Mar 25;8(1):e000961. doi: 10.1136/bmjdrc-2019-000961 (PMC7170411; doi:10.1136/bmjdrc-2019-000961), 2020-03-25
Supplement: bmjdrc-2019-000961supp001.pdf [file bmjdrc-2019-000961supp001.pdf]

Serum vitamin K1 associated to micro- and/or macroangiopathy in  
individuals with and without diabetes  
**Online-only supplementary material**

*Supplementary Table S1 Pre-defined list from Diabetes Impact Study [1] of codes of diagnoses, treatments and interventions qualifying for the diagnosis of diabetes and related complications. This was used to define the persons with disease on the existence of micro- and/or macroangiopathic diagnoses.*

**Explanation of fields:**

**Code:** Codes of diagnosis or interventions

**Code Category:** Specification of coding system, incl.

ICD8: WHO International Classification of Diseases, version 8

ICD10: WHO International Classification of Diseases, version 10

**Code Label:** Code text, including abbreviation:

NOS: Not otherwise specified

**Clinical domain:** Specification of the clinical domain or organ system relating to the code:

Diagnosis of diabetes

Diabetes treatment in general

Cardiovascular disease

Cerebrovascular disease

Peripheral nervous and vascular system

Eye disease

Kidney disease

**Code Group:** Specification of the coding group:

Diagnosis

Treatment

Surgical interventions

**Microangiopathy:** Indicates qualification for microangiopathy:

0: Code is not specific for microangiopathy

1: Code is specific for microangiopathy

X: Unspecified code (impossible to determine whether the code qualifies for microangiopathy)

**Macroangiopathy:** Indicates qualification for macroangiopathy:

0: Code is not specific for macroangiopathy

1: Code is specific for macroangiopathy

X: Unspecified code (impossible to determine whether the code qualifies for macroangiopathy)

| Code  | Code category                  | Code label                                         | Clinical domain           | Code Group | Micro-angio-pathy | Macro-angio-pathy |
|-------|--------------------------------|----------------------------------------------------|---------------------------|------------|-------------------|-------------------|
| 24900 | ICD-8 - Disease Classification | Diabetes without complications                     | Dmgeneral                 | Diagnosis  | 0                 | 0                 |
| 24901 | ICD-8 - Disease Classification | Diabetes with eye complications                    | Eyes                      | Diagnosis  | 1                 | 0                 |
| 24902 | ICD-8 - Disease Classification | Diabetes with renal complication/nephropathy       | Kidneys                   | Diagnosis  | 1                 | 0                 |
| 24903 | ICD-8 - Disease Classification | Diabetes with neurological complication/neuropathy | Peripheral nerves/vessels | Diagnosis  | 1                 | 0                 |
| 24904 | ICD-8 - Disease Classification | Diabetes with angiopathy                           | Peripheral nerves/vessels | Diagnosis  | 1                 | 0                 |
| 24905 | ICD-8 - Disease Classification | Diabetes with gangraene                            | Peripheral nerves/vessels | Diagnosis  | 1                 | 0                 |
| 24906 | ICD-8 - Disease Classification | Diabetic coma/ketoacidosis/hyperosmolarity         | DMgeneral                 | Diagnosis  | 0                 | 0                 |
| 24907 | ICD-8 - Disease Classification | Diabetic coma/ketoacidosis/hyperosmolarity         | DMgeneral                 | Diagnosis  | 0                 | 0                 |
| 24908 | ICD-8 - Disease Classification | Diabetes with other complication NOS               | DMgeneral                 | Diagnosis  | x                 | x                 |
| 24909 | ICD-8 - Disease Classification | Diabetes (diagnosis only)                          | DMgeneral                 | Diagnosis  | 0                 | 0                 |
| 25000 | ICD-8 - Disease Classification | Diabetes without complications                     | DMgeneral                 | Diagnosis  | 0                 | 0                 |
| 25001 | ICD-8 - Disease Classification | Diabetes with eye complications                    | Eyes                      | Diagnosis  | 1                 | 0                 |
| 25002 | ICD-8 - Disease Classification | Diabetes with renal complication/nephropathy       | Kidneys                   | Diagnosis  | 1                 | 0                 |
| 25003 | ICD-8 - Disease Classification | Diabetes with neurological complication/neuropathy | Peripheral nerves/vessels | Diagnosis  | 1                 | 0                 |
| 25004 | ICD-8 - Disease Classification | Diabetes with angiopathy                           | Peripheral nerves/vessels | Diagnosis  | 1                 | 0                 |
| 25005 | ICD-8 - Disease Classification | Diabetes with gangraene                            | Peripheral nerves/vessels | Diagnosis  | 1                 | 0                 |
| 25006 | ICD-8 - Disease Classification | Diabetic coma/ketoacidosis/hyperosmolarity         | DMgeneral                 | Diagnosis  | 0                 | 0                 |
| 25007 | ICD-8 - Disease Classification | Diabetic coma/ketoacidosis/hyperosmolarity         | DMgeneral                 | Diagnosis  | 0                 | 0                 |
| 25008 | ICD-8 - Disease Classification | Diabetes with other complication NOS               | DMgeneral                 | Diagnosis  | x                 | x                 |
| 25009 | ICD-8 - Disease Classification | Diabetes (diagnosis only)                          | DMgeneral                 | Diagnosis  | 0                 | 0                 |
| 37909 | ICD-8 - Disease Classification | Blindness                                          | Eyes                      | Diagnosis  | 1                 | 0                 |
| 37919 | ICD-8 - Disease Classification | Blindness                                          | Eyes                      | Diagnosis  | 1                 | 0                 |
| 37929 | ICD-8 - Disease Classification | Blindness                                          | Eyes                      | Diagnosis  | 1                 | 0                 |
| 37939 | ICD-8 - Disease Classification | Blindness                                          | Eyes                      | Diagnosis  | 1                 | 0                 |
| 41009 | ICD-8 - Disease Classification | Myocardial infarction, no compl. Indicated         | Heart                     | Diagnosis  | 0                 | 1                 |
| 41099 | ICD-8 - Disease Classification | Myocardial infarction, no compl. Indicated         | Heart                     | Diagnosis  | 0                 | 1                 |
| 42709 | ICD-8 - Disease Classification | Heart failure                                      | Heart                     | Diagnosis  | 0                 | 1                 |
| 42710 | ICD-8 - Disease Classification | Heart failure                                      | Heart                     | Diagnosis  | 0                 | 1                 |
| 42711 | ICD-8 - Disease Classification | Heart failure                                      | Heart                     | Diagnosis  | 0                 | 1                 |
| 42719 | ICD-8 - Disease Classification | Heart failure                                      | Heart                     | Diagnosis  | 0                 | 1                 |
| 43100 | ICD-8 - Disease Classification | Intracerebral haemorrhage                          | CNS                       | Diagnosis  | 0                 | 1                 |
| 43101 | ICD-8 - Disease Classification | Intracerebral haemorrhage                          | CNS                       | Diagnosis  | 0                 | 1                 |
| 43108 | ICD-8 - Disease Classification | Intracerebral haemorrhage                          | CNS                       | Diagnosis  | 0                 | 1                 |
| 43109 | ICD-8 - Disease Classification | Intracerebral haemorrhage                          | CNS                       | Diagnosis  | 0                 | 1                 |
| 43190 | ICD-8 - Disease Classification | Intracerebral haemorrhage                          | CNS                       | Diagnosis  | 0                 | 1                 |
| 43191 | ICD-8 - Disease Classification | Intracerebral haemorrhage                          | CNS                       | Diagnosis  | 0                 | 1                 |
| 43198 | ICD-8 - Disease Classification | Intracerebral haemorrhage                          | CNS                       | Diagnosis  | 0                 | 1                 |
| 43199 | ICD-8 - Disease Classification | Intracerebral haemorrhage                          | CNS                       | Diagnosis  | 0                 | 1                 |
| 43200 | ICD-8 - Disease Classification | Stroke                                             | CNS                       | Diagnosis  | 0                 | 1                 |
| 43201 | ICD-8 - Disease Classification | Stroke                                             | CNS                       | Diagnosis  | 0                 | 1                 |
| 43202 | ICD-8 - Disease Classification | Stroke                                             | CNS                       | Diagnosis  | 0                 | 1                 |
| 43208 | ICD-8 - Disease Classification | Stroke                                             | CNS                       | Diagnosis  | 0                 | 1                 |
| 43209 | ICD-8 - Disease Classification | Stroke                                             | CNS                       | Diagnosis  | 0                 | 1                 |
| 43290 | ICD-8 - Disease Classification | Stroke                                             | CNS                       | Diagnosis  | 0                 | 1                 |
| 43291 | ICD-8 - Disease Classification | Stroke                                             | CNS                       | Diagnosis  | 0                 | 1                 |
| 43292 | ICD-8 - Disease Classification | Stroke                                             | CNS                       | Diagnosis  | 0                 | 1                 |
| 43293 | ICD-8 - Disease Classification | Stroke                                             | CNS                       | Diagnosis  | 0                 | 1                 |
| 43298 | ICD-8 - Disease Classification | Stroke                                             | CNS                       | Diagnosis  | 0                 | 1                 |
| 43299 | ICD-8 - Disease Classification | Stroke                                             | CNS                       | Diagnosis  | 0                 | 1                 |
| 43309 | ICD-8 - Disease Classification | Stroke                                             | CNS                       | Diagnosis  | 0                 | 1                 |

| Code  | Code category                   | Code label                       | Clinical domain           | Code Group             | Micro-angio-pathy | Macro-angio-pathy |
|-------|---------------------------------|----------------------------------|---------------------------|------------------------|-------------------|-------------------|
| 43399 | ICD-8 - Disease Classification  | Stroke                           | CNS                       | Diagnosis              | 0                 | 1                 |
| 43409 | ICD-8 - Disease Classification  | Stroke                           | CNS                       | Diagnosis              | 0                 | 1                 |
| 43499 | ICD-8 - Disease Classification  | Stroke                           | CNS                       | Diagnosis              | 0                 | 1                 |
| 43601 | ICD-8 - Disease Classification  | Stroke                           | CNS                       | Diagnosis              | 0                 | 1                 |
| 43690 | ICD-8 - Disease Classification  | Stroke                           | CNS                       | Diagnosis              | 0                 | 1                 |
| 44500 | ICD-8 - Disease Classification  | Gangrena of lower limb           | Peripheral nerves/vessels | Diagnosis              | 1                 | 0                 |
| 44508 | ICD-8 - Disease Classification  | Gangrena of lower limb           | Peripheral nerves/vessels | Diagnosis              | 1                 | 0                 |
| 44509 | ICD-8 - Disease Classification  | Gangrena of lower limb           | Peripheral nerves/vessels | Diagnosis              | 1                 | 0                 |
| 44590 | ICD-8 - Disease Classification  | Gangrena of lower limb           | Peripheral nerves/vessels | Diagnosis              | 1                 | 0                 |
| 44599 | ICD-8 - Disease Classification  | Gangrena of lower limb           | Peripheral nerves/vessels | Diagnosis              | 1                 | 0                 |
| 79299 | ICD-8 - Disease Classification  | Uraemia                          | Kidneys                   | Diagnosis              | 1                 | 0                 |
| Y9509 | ICD-8 - Disease Classification  | Kidney transplantation           | Kidneys                   | Diagnosis              | 1                 | 0                 |
| 16070 | Danish surgery code before 1995 | Surgery for severe eye disease   | Eyes                      | Surgical interventions | 1                 | 0                 |
| 16080 | Danish surgery code before 1995 | Surgery for severe eye disease   | Eyes                      | Surgical interventions | 1                 | 0                 |
| 16090 | Danish surgery code before 1995 | Surgery for severe eye disease   | Eyes                      | Surgical interventions | 1                 | 0                 |
| 16100 | Danish surgery code before 1995 | Surgery for severe eye disease   | Eyes                      | Surgical interventions | 1                 | 0                 |
| 16110 | Danish surgery code before 1995 | Surgery for severe eye disease   | Eyes                      | Surgical interventions | 1                 | 0                 |
| 16530 | Danish surgery code before 1995 | Surgery for severe eye disease   | Eyes                      | Surgical interventions | 1                 | 0                 |
| 16580 | Danish surgery code before 1995 | Surgery for severe eye disease   | Eyes                      | Surgical interventions | 1                 | 0                 |
| 16600 | Danish surgery code before 1995 | Surgery for severe eye disease   | Eyes                      | Surgical interventions | 1                 | 0                 |
| 17000 | Danish surgery code before 1995 | Surgery for moderate eye disease | Eyes                      | Surgical interventions | 0                 | 0                 |
| 17010 | Danish surgery code before 1995 | Surgery for moderate eye disease | Eyes                      | Surgical interventions | 0                 | 0                 |
| 17090 | Danish surgery code before 1995 | Surgery for moderate eye disease | Eyes                      | Surgical interventions | 0                 | 0                 |
| 17100 | Danish surgery code before 1995 | Surgery for moderate eye disease | Eyes                      | Surgical interventions | 0                 | 0                 |
| 17110 | Danish surgery code before 1995 | Surgery for moderate eye disease | Eyes                      | Surgical interventions | 0                 | 0                 |
| 17120 | Danish surgery code before 1995 | Surgery for moderate eye disease | Eyes                      | Surgical interventions | 0                 | 0                 |
| 17130 | Danish surgery code before 1995 | Surgery for moderate eye disease | Eyes                      | Surgical interventions | 0                 | 0                 |
| 17140 | Danish surgery code before 1995 | Surgery for moderate eye disease | Eyes                      | Surgical interventions | 0                 | 0                 |
| 17200 | Danish surgery code before 1995 | Surgery for moderate eye disease | Eyes                      | Surgical interventions | 0                 | 0                 |
| 17210 | Danish surgery code before 1995 | Surgery for moderate eye disease | Eyes                      | Surgical interventions | 0                 | 0                 |
| 17220 | Danish surgery code before 1995 | Surgery for moderate eye disease | Eyes                      | Surgical interventions | 0                 | 0                 |
| 17230 | Danish surgery code before 1995 | Surgery for moderate eye disease | Eyes                      | Surgical interventions | 0                 | 0                 |
| 17231 | Danish surgery code before 1995 | Surgery for moderate eye disease | Eyes                      | Surgical interventions | 0                 | 0                 |
| 17232 | Danish surgery code before 1995 | Surgery for moderate eye disease | Eyes                      | Surgical interventions | 0                 | 0                 |
| 17238 | Danish surgery code before 1995 | Surgery for moderate eye disease | Eyes                      | Surgical interventions | 0                 | 0                 |
| 17239 | Danish surgery code before 1995 | Surgery for moderate eye disease | Eyes                      | Surgical interventions | 0                 | 0                 |
| 17260 | Danish surgery code before 1995 | Surgery for moderate eye disease | Eyes                      | Surgical interventions | 0                 | 0                 |
| 17261 | Danish surgery code before 1995 | Surgery for moderate eye disease | Eyes                      | Surgical interventions | 0                 | 0                 |
| 17262 | Danish surgery code before 1995 | Surgery for moderate eye disease | Eyes                      | Surgical interventions | 0                 | 0                 |
| 17263 | Danish surgery code before 1995 | Surgery for moderate eye disease | Eyes                      | Surgical interventions | 0                 | 0                 |
| 17269 | Danish surgery code before 1995 | Surgery for moderate eye disease | Eyes                      | Surgical interventions | 0                 | 0                 |
| 30019 | Danish surgery code before 1995 | Coronary bypass operation, CABG  | Heart                     | Surgical interventions | 0                 | 1                 |
| 30029 | Danish surgery code before 1995 | Coronary bypass operation, CABG  | Heart                     | Surgical interventions | 0                 | 1                 |
| 30039 | Danish surgery code before 1995 | Coronary bypass operation, CABG  | Heart                     | Surgical interventions | 0                 | 1                 |
| 30049 | Danish surgery code before 1995 | Coronary bypass operation, CABG  | Heart                     | Surgical interventions | 0                 | 1                 |
| 30059 | Danish surgery code before 1995 | Coronary bypass operation, CABG  | Heart                     | Surgical interventions | 0                 | 1                 |
| 30069 | Danish surgery code before 1995 | Coronary bypass operation, CABG  | Heart                     | Surgical interventions | 0                 | 1                 |
| 30079 | Danish surgery code before 1995 | Coronary bypass operation, CABG  | Heart                     | Surgical interventions | 0                 | 1                 |
| 30089 | Danish surgery code before 1995 | Coronary bypass operation, CABG  | Heart                     | Surgical interventions | 0                 | 1                 |
| 30099 | Danish surgery code before 1995 | Coronary bypass operation, CABG  | Heart                     | Surgical interventions | 0                 | 1                 |

| Code  | Code category                   | Code label                                            | Clinical domain           | Code Group             | Micro-angio-pathy | Macro-angio-pathy |
|-------|---------------------------------|-------------------------------------------------------|---------------------------|------------------------|-------------------|-------------------|
| 30109 | Danish surgery code before 1995 | Coronary bypass operation, CABG                       | Heart                     | Surgical interventions | 0                 | 1                 |
| 30119 | Danish surgery code before 1995 | Coronary bypass operation, CABG                       | Heart                     | Surgical interventions | 0                 | 1                 |
| 30120 | Danish surgery code before 1995 | Coronary bypass operation, CABG                       | Heart                     | Surgical interventions | 0                 | 1                 |
| 30129 | Danish surgery code before 1995 | Coronary bypass operation, CABG                       | Heart                     | Surgical interventions | 0                 | 1                 |
| 30139 | Danish surgery code before 1995 | Coronary bypass operation, CABG                       | Heart                     | Surgical interventions | 0                 | 1                 |
| 30149 | Danish surgery code before 1995 | Coronary bypass operation, CABG                       | Heart                     | Surgical interventions | 0                 | 1                 |
| 30159 | Danish surgery code before 1995 | Coronary bypass operation, CABG                       | Heart                     | Surgical interventions | 0                 | 1                 |
| 30160 | Danish surgery code before 1995 | Coronary bypass operation, CABG                       | Heart                     | Surgical interventions | 0                 | 1                 |
| 30169 | Danish surgery code before 1995 | Coronary bypass operation, CABG                       | Heart                     | Surgical interventions | 0                 | 1                 |
| 30179 | Danish surgery code before 1995 | Coronary bypass operation, CABG                       | Heart                     | Surgical interventions | 0                 | 1                 |
| 30189 | Danish surgery code before 1995 | Coronary bypass operation, CABG                       | Heart                     | Surgical interventions | 0                 | 1                 |
| 30199 | Danish surgery code before 1995 | Coronary bypass operation, CABG                       | Heart                     | Surgical interventions | 0                 | 1                 |
| 30200 | Danish surgery code before 1995 | Coronary bypass operation, CABG                       | Heart                     | Surgical interventions | 0                 | 1                 |
| 30350 | Danish surgery code before 1995 | Percutaneous transluminal coronary intervention, PTCl | Heart                     | Surgical interventions | 0                 | 1                 |
| 30354 | Danish surgery code before 1995 | Coronary bypass operation, CABG                       | Heart                     | Surgical interventions | 0                 | 1                 |
| 31629 | Danish surgery code before 1995 | Coronary bypass operation, CABG                       | Heart                     | Surgical interventions | 0                 | 1                 |
| 31639 | Danish surgery code before 1995 | Coronary bypass operation, CABG                       | Heart                     | Surgical interventions | 0                 | 1                 |
| 57480 | Danish surgery code before 1995 | Kidney transplantation                                | Kidneys                   | Surgical interventions | 1                 | 0                 |
| 57490 | Danish surgery code before 1995 | Kidney transplantation                                | Kidneys                   | Surgical interventions | 1                 | 0                 |
| 80520 | Danish surgery code before 1995 | Amputation at or below ankle level                    | Peripheral nerves/vessels | Surgical interventions | 1                 | 1                 |
| 80540 | Danish surgery code before 1995 | Amputation at or below ankle level                    | Peripheral nerves/vessels | Surgical interventions | 1                 | 1                 |
| 80560 | Danish surgery code before 1995 | Amputation at or below ankle level                    | Peripheral nerves/vessels | Surgical interventions | 1                 | 1                 |
| 80580 | Danish surgery code before 1995 | Amputation at or below ankle level                    | Peripheral nerves/vessels | Surgical interventions | 1                 | 1                 |
| 80600 | Danish surgery code before 1995 | Amputation at or below ankle level                    | Peripheral nerves/vessels | Surgical interventions | 1                 | 1                 |
| 80620 | Danish surgery code before 1995 | Amputation at or below ankle level                    | Peripheral nerves/vessels | Surgical interventions | 1                 | 1                 |
| 80640 | Danish surgery code before 1995 | Amputation at or below ankle level                    | Peripheral nerves/vessels | Surgical interventions | 1                 | 1                 |
| 80660 | Danish surgery code before 1995 | Amputation at or below ankle level                    | Peripheral nerves/vessels | Surgical interventions | 1                 | 1                 |
| 80740 | Danish surgery code before 1995 | Amputation between ankle and knee                     | Peripheral nerves/vessels | Surgical interventions | 1                 | 1                 |
| 80780 | Danish surgery code before 1995 | Amputation between ankle and knee                     | Peripheral nerves/vessels | Surgical interventions | 1                 | 1                 |
| 80840 | Danish surgery code before 1995 | Amputation above knee level                           | Peripheral nerves/vessels | Surgical interventions | 1                 | 1                 |
| 80860 | Danish surgery code before 1995 | Amputation above knee level                           | Peripheral nerves/vessels | Surgical interventions | 1                 | 1                 |
| 81031 | Danish surgery code before 1995 | Amputation above knee level                           | Peripheral nerves/vessels | Surgical interventions | 1                 | 1                 |
| 81041 | Danish surgery code before 1995 | Amputation between ankle and knee                     | Peripheral nerves/vessels | Surgical interventions | 1                 | 1                 |
| 81051 | Danish surgery code before 1995 | Amputation between ankle and knee                     | Peripheral nerves/vessels | Surgical interventions | 1                 | 1                 |
| 81052 | Danish surgery code before 1995 | Amputation at or below ankle level                    | Peripheral nerves/vessels | Surgical interventions | 1                 | 1                 |
| 81053 | Danish surgery code before 1995 | Amputation at or below ankle level                    | Peripheral nerves/vessels | Surgical interventions | 1                 | 1                 |
| 81054 | Danish surgery code before 1995 | Amputation at or below ankle level                    | Peripheral nerves/vessels | Surgical interventions | 1                 | 1                 |
| 81055 | Danish surgery code before 1995 | Amputation at or below ankle level                    | Peripheral nerves/vessels | Surgical interventions | 1                 | 1                 |
| 81059 | Danish surgery code before 1995 | Amputation at or below ankle level                    | Peripheral nerves/vessels | Surgical interventions | 1                 | 1                 |
| 87409 | Danish surgery code before 1995 | Dialysis                                              | Kidneys                   | Surgical interventions | 1                 | 0                 |
| 87419 | Danish surgery code before 1995 | Dialysis                                              | Kidneys                   | Surgical interventions | 1                 | 0                 |
| 87420 | Danish surgery code before 1995 | Dialysis                                              | Kidneys                   | Surgical interventions | 1                 | 0                 |
| 87430 | Danish surgery code before 1995 | Dialysis                                              | Kidneys                   | Surgical interventions | 1                 | 0                 |
| 87431 | Danish surgery code before 1995 | Dialysis                                              | Kidneys                   | Surgical interventions | 1                 | 0                 |
| 87432 | Danish surgery code before 1995 | Dialysis                                              | Kidneys                   | Surgical interventions | 1                 | 0                 |
| 87440 | Danish surgery code before 1995 | Dialysis                                              | Kidneys                   | Surgical interventions | 1                 | 0                 |
| 87510 | Danish surgery code before 1995 | Amputation at or below ankle level                    | Peripheral nerves/vessels | Surgical interventions | 1                 | 1                 |
| 87600 | Danish surgery code before 1995 | Amputation at or below ankle level                    | Peripheral nerves/vessels | Surgical interventions | 1                 | 1                 |
| 87610 | Danish surgery code before 1995 | Amputation at or below ankle level                    | Peripheral nerves/vessels | Surgical interventions | 1                 | 1                 |
| 87710 | Danish surgery code before 1995 | Amputation between ankle and knee                     | Peripheral nerves/vessels | Surgical interventions | 1                 | 1                 |

| Code    | Code category                       | Code label                              | Clinical domain           | Code Group             | Micro-angio-pathy | Macro-angio-pathy |
|---------|-------------------------------------|-----------------------------------------|---------------------------|------------------------|-------------------|-------------------|
| 87800   | Danish surgery code before 1995     | Amputation above knee level             | Peripheral nerves/vessels | Surgical interventions | 1                 | 1                 |
| 94300   | Danish surgery code before 1995     | Dialysis                                | Kidneys                   | Surgical interventions | 1                 | 0                 |
| 94340   | Danish surgery code before 1995     | Dialysis                                | Kidneys                   | Surgical interventions | 1                 | 0                 |
| BBHA    | Danish intervention code since 1995 | Drug treatment specific for diabetes    | DMgeneral                 | Treatment              | 0                 | 0                 |
| BBHA0   | Danish intervention code since 1995 | Drug treatment specific for diabetes    | DMgeneral                 | Treatment              | 0                 | 0                 |
| BBHA00  | Danish intervention code since 1995 | Drug treatment specific for diabetes    | DMgeneral                 | Treatment              | 0                 | 0                 |
| BBHA01  | Danish intervention code since 1995 | Drug treatment specific for diabetes    | DMgeneral                 | Treatment              | 0                 | 0                 |
| BBHF0   | Danish intervention code since 1995 | Drug treatment specific for diabetes    | DMgeneral                 | Treatment              | 0                 | 0                 |
| BBHF00  | Danish intervention code since 1995 | Drug treatment specific for diabetes    | DMgeneral                 | Treatment              | 0                 | 0                 |
| BBHF01  | Danish intervention code since 1995 | Drug treatment specific for diabetes    | DMgeneral                 | Treatment              | 0                 | 0                 |
| BBHF02  | Danish intervention code since 1995 | Drug treatment specific for diabetes    | DMgeneral                 | Treatment              | 0                 | 0                 |
| BJFD2   | Danish intervention code since 1995 | Dialysis                                | Kidneys                   | Treatment              | 1                 | 0                 |
| BJFD20  | Danish intervention code since 1995 | Dialysis                                | Kidneys                   | Treatment              | 1                 | 0                 |
| BJFD21  | Danish intervention code since 1995 | Dialysis                                | Kidneys                   | Treatment              | 1                 | 0                 |
| BJFD22  | Danish intervention code since 1995 | Dialysis                                | Kidneys                   | Treatment              | 1                 | 0                 |
| BJFD23  | Danish intervention code since 1995 | Dialysis                                | Kidneys                   | Treatment              | 1                 | 0                 |
| BJFD24  | Danish intervention code since 1995 | Dialysis                                | Kidneys                   | Treatment              | 1                 | 0                 |
| BJFD25  | Danish intervention code since 1995 | Dialysis                                | Kidneys                   | Treatment              | 1                 | 0                 |
| BJFD26  | Danish intervention code since 1995 | Dialysis                                | Kidneys                   | Treatment              | 1                 | 0                 |
| BJFD27  | Danish intervention code since 1995 | Dialysis                                | Kidneys                   | Treatment              | 1                 | 0                 |
| BJFZ    | Danish intervention code since 1995 | Dialysis                                | Kidneys                   | Treatment              | 1                 | 0                 |
| BJFZ0   | Danish intervention code since 1995 | Dialysis                                | Kidneys                   | Treatment              | 1                 | 0                 |
| BJFZ00  | Danish intervention code since 1995 | Dialysis                                | Kidneys                   | Treatment              | 1                 | 0                 |
| BJFZ01  | Danish intervention code since 1995 | Dialysis                                | Kidneys                   | Treatment              | 1                 | 0                 |
| BJFZ1   | Danish intervention code since 1995 | Dialysis                                | Kidneys                   | Treatment              | 1                 | 0                 |
| BJFZ10  | Danish intervention code since 1995 | Dialysis                                | Kidneys                   | Treatment              | 1                 | 0                 |
| BJFZ11  | Danish intervention code since 1995 | Dialysis                                | Kidneys                   | Treatment              | 1                 | 0                 |
| BJFZ4   | Danish intervention code since 1995 | Dialysis                                | Kidneys                   | Surgical interventions | 1                 | 0                 |
| BJFZ40  | Danish intervention code since 1995 | Dialysis                                | Kidneys                   | Surgical interventions | 1                 | 0                 |
| BJFZ40A | Danish intervention code since 1995 | Dialysis                                | Kidneys                   | Surgical interventions | 1                 | 0                 |
| BJFZ41  | Danish intervention code since 1995 | Dialysis                                | Kidneys                   | Surgical interventions | 1                 | 0                 |
| BJFZ41A | Danish intervention code since 1995 | Dialysis                                | Kidneys                   | Surgical interventions | 1                 | 0                 |
| BJFZ42  | Danish intervention code since 1995 | Dialysis                                | Kidneys                   | Surgical interventions | 1                 | 0                 |
| BJFZ43  | Danish intervention code since 1995 | Dialysis                                | Kidneys                   | Surgical interventions | 1                 | 0                 |
| BJFZ43A | Danish intervention code since 1995 | Dialysis                                | Kidneys                   | Surgical interventions | 1                 | 0                 |
| BJFZ44  | Danish intervention code since 1995 | Dialysis                                | Kidneys                   | Surgical interventions | 1                 | 0                 |
| BJFZ45  | Danish intervention code since 1995 | Dialysis                                | Kidneys                   | Surgical interventions | 1                 | 0                 |
| BJFZ46  | Danish intervention code since 1995 | Dialysis                                | Kidneys                   | Surgical interventions | 1                 | 0                 |
| BJFZ47  | Danish intervention code since 1995 | Dialysis                                | Kidneys                   | Surgical interventions | 1                 | 0                 |
| BJFZ48  | Danish intervention code since 1995 | Dialysis                                | Kidneys                   | Surgical interventions | 1                 | 0                 |
| BJFZ49  | Danish intervention code since 1995 | Dialysis                                | Kidneys                   | Surgical interventions | 1                 | 0                 |
| BJFZ4A  | Danish intervention code since 1995 | Dialysis                                | Kidneys                   | Surgical interventions | 1                 | 0                 |
| BJFZ6   | Danish intervention code since 1995 | Dialysis                                | Kidneys                   | Treatment              | 1                 | 0                 |
| BJFZ60  | Danish intervention code since 1995 | Dialysis                                | Kidneys                   | Treatment              | 1                 | 0                 |
| BJFZ9   | Danish intervention code since 1995 | Dialysis                                | Kidneys                   | Treatment              | 1                 | 0                 |
| BJFZ90  | Danish intervention code since 1995 | Dialysis                                | Kidneys                   | Treatment              | 1                 | 0                 |
| BJFZ91  | Danish intervention code since 1995 | Dialysis                                | Kidneys                   | Treatment              | 1                 | 0                 |
| BUBE0   | Danish intervention code since 1995 | Dietary treatment specific for diabetes | DMgeneral                 | Treatment              | 0                 | 0                 |
| BUBE00  | Danish intervention code since 1995 | Dietary treatment specific for diabetes | DMgeneral                 | Treatment              | 0                 | 0                 |
| BUBE01  | Danish intervention code since 1995 | Dietary treatment specific for diabetes | DMgeneral                 | Treatment              | 0                 | 0                 |

| Code   | Code category                   | Code label                                         | Clinical domain           | Code Group | Micro-angio-pathy | Macro-angio-pathy |
|--------|---------------------------------|----------------------------------------------------|---------------------------|------------|-------------------|-------------------|
| DE10   | ICD-10 - Disease Classification | Diabetes (diagnosis only)                          | DMgeneral                 | Diagnosis  | 0                 | 0                 |
| DE100  | ICD-10 - Disease Classification | Diabetic coma/ketoacidosis/hyperosmolarity         | DMgeneral                 | Diagnosis  | 0                 | 0                 |
| DE100A | ICD-10 - Disease Classification | Diabetic coma/ketoacidosis/hyperosmolarity         | DMgeneral                 | Diagnosis  | 0                 | 0                 |
| DE100B | ICD-10 - Disease Classification | Diabetic coma/ketoacidosis/hyperosmolarity         | DMgeneral                 | Diagnosis  | 0                 | 0                 |
| DE100C | ICD-10 - Disease Classification | Diabetic coma/ketoacidosis/hyperosmolarity         | DMgeneral                 | Diagnosis  | 0                 | 0                 |
| DE100D | ICD-10 - Disease Classification | Diabetic coma/ketoacidosis/hyperosmolarity         | DMgeneral                 | Diagnosis  | 0                 | 0                 |
| DE100E | ICD-10 - Disease Classification | Diabetic coma/ketoacidosis/hyperosmolarity         | DMgeneral                 | Diagnosis  | 0                 | 0                 |
| DE100F | ICD-10 - Disease Classification | Diabetic coma/ketoacidosis/hyperosmolarity         | DMgeneral                 | Diagnosis  | 0                 | 0                 |
| DE101  | ICD-10 - Disease Classification | Diabetic coma/ketoacidosis/hyperosmolarity         | DMgeneral                 | Diagnosis  | 0                 | 0                 |
| DE102  | ICD-10 - Disease Classification | Diabetes with renal complication/nephropathy       | Kidneys                   | Diagnosis  | 1                 | 0                 |
| DE103  | ICD-10 - Disease Classification | Diabetes with eye complications                    | Eyes                      | Diagnosis  | 1                 | 0                 |
| DE104  | ICD-10 - Disease Classification | Diabetes with neurological complication/neuropathy | Peripheral nerves/vessels | Diagnosis  | 1                 | 0                 |
| DE105  | ICD-10 - Disease Classification | Diabetes with angiopathy                           | Peripheral nerves/vessels | Diagnosis  | 1                 | 0                 |
| DE105A | ICD-10 - Disease Classification | Diabetes with angiopathy                           | Peripheral nerves/vessels | Diagnosis  | 1                 | 0                 |
| DE105B | ICD-10 - Disease Classification | Diabetes with foot ulcer                           | Peripheral nerves/vessels | Diagnosis  | 1                 | 0                 |
| DE105C | ICD-10 - Disease Classification | Diabetes with gangraene                            | Peripheral nerves/vessels | Diagnosis  | 1                 | 0                 |
| DE105D | ICD-10 - Disease Classification | Diabetes with angiopathy                           | Peripheral nerves/vessels | Diagnosis  | 1                 | 0                 |
| DE106  | ICD-10 - Disease Classification | Diabetes with other complication NOS               | DMgeneral                 | Diagnosis  | x                 | x                 |
| DE107  | ICD-10 - Disease Classification | Diabetes with multiple complications NOS           | DMgeneral                 | Diagnosis  | x                 | x                 |
| DE108  | ICD-10 - Disease Classification | Diabetes with other complication NOS               | DMgeneral                 | Diagnosis  | x                 | x                 |
| DE109  | ICD-10 - Disease Classification | Diabetes without complications                     | DMgeneral                 | Diagnosis  | 0                 | 0                 |
| DE109A | ICD-10 - Disease Classification | Diabetes (diagnosis only)                          | DMgeneral                 | Diagnosis  | 0                 | 0                 |
| DE11   | ICD-10 - Disease Classification | Diabetes (diagnosis only)                          | DMgeneral                 | Diagnosis  | 0                 | 0                 |
| DE110  | ICD-10 - Disease Classification | Diabetic coma/ketoacidosis/hyperosmolarity         | DMgeneral                 | Diagnosis  | 0                 | 0                 |
| DE110A | ICD-10 - Disease Classification | Diabetic coma/ketoacidosis/hyperosmolarity         | DMgeneral                 | Diagnosis  | 0                 | 0                 |
| DE110B | ICD-10 - Disease Classification | Diabetic coma/ketoacidosis/hyperosmolarity         | DMgeneral                 | Diagnosis  | 0                 | 0                 |
| DE110C | ICD-10 - Disease Classification | Diabetic coma/ketoacidosis/hyperosmolarity         | DMgeneral                 | Diagnosis  | 0                 | 0                 |
| DE110D | ICD-10 - Disease Classification | Diabetic coma/ketoacidosis/hyperosmolarity         | DMgeneral                 | Diagnosis  | 0                 | 0                 |
| DE110E | ICD-10 - Disease Classification | Diabetic coma/ketoacidosis/hyperosmolarity         | DMgeneral                 | Diagnosis  | 0                 | 0                 |
| DE111  | ICD-10 - Disease Classification | Diabetic coma/ketoacidosis/hyperosmolarity         | DMgeneral                 | Diagnosis  | 0                 | 0                 |
| DE112  | ICD-10 - Disease Classification | Diabetes with renal complication/nephropathy       | Kidneys                   | Diagnosis  | 1                 | 0                 |
| DE113  | ICD-10 - Disease Classification | Diabetes with eye complications                    | Eyes                      | Diagnosis  | 1                 | 0                 |
| DE114  | ICD-10 - Disease Classification | Diabetes with neurological complication/neuropathy | Peripheral nerves/vessels | Diagnosis  | 1                 | 0                 |
| DE115  | ICD-10 - Disease Classification | Diabetes with angiopathy                           | Peripheral nerves/vessels | Diagnosis  | 1                 | 0                 |
| DE115A | ICD-10 - Disease Classification | Diabetes with angiopathy                           | Peripheral nerves/vessels | Diagnosis  | 1                 | 0                 |
| DE115B | ICD-10 - Disease Classification | Diabetes with foot ulcer                           | Peripheral nerves/vessels | Diagnosis  | 1                 | 0                 |
| DE115C | ICD-10 - Disease Classification | Diabetes with gangraene                            | Peripheral nerves/vessels | Diagnosis  | 1                 | 0                 |
| DE115D | ICD-10 - Disease Classification | Diabetes with angiopathy                           | Peripheral nerves/vessels | Diagnosis  | 1                 | 0                 |
| DE116  | ICD-10 - Disease Classification | Diabetes with other complication NOS               | DMgeneral                 | Diagnosis  | x                 | x                 |
| DE117  | ICD-10 - Disease Classification | Diabetes with multiple complications NOS           | DMgeneral                 | Diagnosis  | x                 | x                 |
| DE118  | ICD-10 - Disease Classification | Diabetes with other complication NOS               | DMgeneral                 | Diagnosis  | x                 | x                 |
| DE119  | ICD-10 - Disease Classification | Diabetes without complications                     | DMgeneral                 | Diagnosis  | 0                 | 0                 |
| DE119A | ICD-10 - Disease Classification | Diabetes (diagnosis only)                          | DMgeneral                 | Diagnosis  | 0                 | 0                 |
| DE12   | ICD-10 - Disease Classification | Diabetes (diagnosis only)                          | DMgeneral                 | Diagnosis  | 0                 | 0                 |
| DE120  | ICD-10 - Disease Classification | Diabetic coma/ketoacidosis/hyperosmolarity         | DMgeneral                 | Diagnosis  | 0                 | 0                 |
| DE120A | ICD-10 - Disease Classification | Diabetic coma/ketoacidosis/hyperosmolarity         | DMgeneral                 | Diagnosis  | 0                 | 0                 |
| DE120B | ICD-10 - Disease Classification | Diabetic coma/ketoacidosis/hyperosmolarity         | DMgeneral                 | Diagnosis  | 0                 | 0                 |
| DE120C | ICD-10 - Disease Classification | Diabetic coma/ketoacidosis/hyperosmolarity         | DMgeneral                 | Diagnosis  | 0                 | 0                 |
| DE120D | ICD-10 - Disease Classification | Diabetic coma/ketoacidosis/hyperosmolarity         | DMgeneral                 | Diagnosis  | 0                 | 0                 |
| DE120E | ICD-10 - Disease Classification | Diabetic coma/ketoacidosis/hyperosmolarity         | DMgeneral                 | Diagnosis  | 0                 | 0                 |

| Code   | Code category                   | Code label                                         | Clinical domain           | Code Group | Micro-angio-pathy | Macro-angio-pathy |
|--------|---------------------------------|----------------------------------------------------|---------------------------|------------|-------------------|-------------------|
| DE121  | ICD-10 - Disease Classification | Diabetic coma/ketoacidosis/hyperosmolarity         | DMgeneral                 | Diagnosis  | 0                 | 0                 |
| DE122  | ICD-10 - Disease Classification | Diabetes with renal complication/nephropathy       | Kidneys                   | Diagnosis  | 1                 | 0                 |
| DE123  | ICD-10 - Disease Classification | Diabetes with eye complications                    | Eyes                      | Diagnosis  | 1                 | 0                 |
| DE124  | ICD-10 - Disease Classification | Diabetes with neurological complication/neuropathy | Peripheral nerves/vessels | Diagnosis  | 1                 | 0                 |
| DE125  | ICD-10 - Disease Classification | Diabetes with angiopathy                           | Peripheral nerves/vessels | Diagnosis  | 1                 | 0                 |
| DE125A | ICD-10 - Disease Classification | Diabetes with angiopathy                           | Peripheral nerves/vessels | Diagnosis  | 1                 | 0                 |
| DE125B | ICD-10 - Disease Classification | Diabetes with foot ulcer                           | Peripheral nerves/vessels | Diagnosis  | 1                 | 0                 |
| DE125C | ICD-10 - Disease Classification | Diabetes with gangraene                            | Peripheral nerves/vessels | Diagnosis  | 1                 | 0                 |
| DE125D | ICD-10 - Disease Classification | Diabetes with angiopathy                           | Peripheral nerves/vessels | Diagnosis  | 1                 | 0                 |
| DE126  | ICD-10 - Disease Classification | Diabetes with other complication NOS               | DMgeneral                 | Diagnosis  | x                 | x                 |
| DE127  | ICD-10 - Disease Classification | Diabetes with multiple complications NOS           | DMgeneral                 | Diagnosis  | x                 | x                 |
| DE128  | ICD-10 - Disease Classification | Diabetes with other complication NOS               | DMgeneral                 | Diagnosis  | x                 | x                 |
| DE129  | ICD-10 - Disease Classification | Diabetes without complications                     | DMgeneral                 | Diagnosis  | 0                 | 0                 |
| DE13   | ICD-10 - Disease Classification | Diabetes (diagnosis only)                          | DMgeneral                 | Diagnosis  | 0                 | 0                 |
| DE130  | ICD-10 - Disease Classification | Diabetic coma/ketoacidosis/hyperosmolarity         | DMgeneral                 | Diagnosis  | 0                 | 0                 |
| DE131  | ICD-10 - Disease Classification | Diabetic coma/ketoacidosis/hyperosmolarity         | DMgeneral                 | Diagnosis  | 0                 | 0                 |
| DE132  | ICD-10 - Disease Classification | Diabetes with renal complication/nephropathy       | Kidneys                   | Diagnosis  | 1                 | 0                 |
| DE133  | ICD-10 - Disease Classification | Diabetes with eye complications                    | Eyes                      | Diagnosis  | 1                 | 0                 |
| DE134  | ICD-10 - Disease Classification | Diabetes with neurological complication/neuropathy | Peripheral nerves/vessels | Diagnosis  | 1                 | 0                 |
| DE135  | ICD-10 - Disease Classification | Diabetes with angiopathy                           | Peripheral nerves/vessels | Diagnosis  | 1                 | 0                 |
| DE135A | ICD-10 - Disease Classification | Diabetes with angiopathy                           | Peripheral nerves/vessels | Diagnosis  | 1                 | 0                 |
| DE135B | ICD-10 - Disease Classification | Diabetes with foot ulcer                           | Peripheral nerves/vessels | Diagnosis  | 1                 | 0                 |
| DE135C | ICD-10 - Disease Classification | Diabetes with gangraene                            | Peripheral nerves/vessels | Diagnosis  | 1                 | 0                 |
| DE135D | ICD-10 - Disease Classification | Diabetes with angiopathy                           | Peripheral nerves/vessels | Diagnosis  | 1                 | 0                 |
| DE136  | ICD-10 - Disease Classification | Diabetes with other complication NOS               | DMgeneral                 | Diagnosis  | x                 | x                 |
| DE137  | ICD-10 - Disease Classification | Diabetes with multiple complications NOS           | DMgeneral                 | Diagnosis  | x                 | x                 |
| DE138  | ICD-10 - Disease Classification | Diabetes with other complication NOS               | DMgeneral                 | Diagnosis  | x                 | x                 |
| DE139  | ICD-10 - Disease Classification | Diabetes without complications                     | DMgeneral                 | Diagnosis  | 0                 | 0                 |
| DE14   | ICD-10 - Disease Classification | Diabetes (diagnosis only)                          | DMgeneral                 | Diagnosis  | 0                 | 0                 |
| DE140  | ICD-10 - Disease Classification | Diabetic coma/ketoacidosis/hyperosmolarity         | DMgeneral                 | Diagnosis  | 0                 | 0                 |
| DE140A | ICD-10 - Disease Classification | Diabetic coma/ketoacidosis/hyperosmolarity         | DMgeneral                 | Diagnosis  | 0                 | 0                 |
| DE140B | ICD-10 - Disease Classification | Diabetic coma/ketoacidosis/hyperosmolarity         | DMgeneral                 | Diagnosis  | 0                 | 0                 |
| DE140C | ICD-10 - Disease Classification | Diabetic coma/ketoacidosis/hyperosmolarity         | DMgeneral                 | Diagnosis  | 0                 | 0                 |
| DE140D | ICD-10 - Disease Classification | Diabetic coma/ketoacidosis/hyperosmolarity         | DMgeneral                 | Diagnosis  | 0                 | 0                 |
| DE141  | ICD-10 - Disease Classification | Diabetic coma/ketoacidosis/hyperosmolarity         | DMgeneral                 | Diagnosis  | 0                 | 0                 |
| DE142  | ICD-10 - Disease Classification | Diabetes with renal complication/nephropathy       | Kidneys                   | Diagnosis  | 1                 | 0                 |
| DE143  | ICD-10 - Disease Classification | Diabetes with eye complications                    | Eyes                      | Diagnosis  | 1                 | 0                 |
| DE144  | ICD-10 - Disease Classification | Diabetes with neurological complication/neuropathy | Peripheral nerves/vessels | Diagnosis  | 1                 | 0                 |
| DE145  | ICD-10 - Disease Classification | Diabetes with angiopathy                           | Peripheral nerves/vessels | Diagnosis  | 1                 | 0                 |
| DE145A | ICD-10 - Disease Classification | Diabetes with angiopathy                           | Peripheral nerves/vessels | Diagnosis  | 1                 | 0                 |
| DE145B | ICD-10 - Disease Classification | Diabetes with foot ulcer                           | Peripheral nerves/vessels | Diagnosis  | 1                 | 0                 |
| DE145C | ICD-10 - Disease Classification | Diabetes with gangraene                            | Peripheral nerves/vessels | Diagnosis  | 1                 | 0                 |
| DE145D | ICD-10 - Disease Classification | Diabetes with angiopathy                           | Peripheral nerves/vessels | Diagnosis  | 1                 | 0                 |
| DE146  | ICD-10 - Disease Classification | Diabetes with other complication NOS               | DMgeneral                 | Diagnosis  | 0                 | 0                 |
| DE147  | ICD-10 - Disease Classification | Diabetes with multiple complications NOS           | DMgeneral                 | Diagnosis  | x                 | x                 |
| DE148  | ICD-10 - Disease Classification | Diabetes with other complication NOS               | DMgeneral                 | Diagnosis  | x                 | x                 |
| DE149  | ICD-10 - Disease Classification | Diabetes without complications                     | DMgeneral                 | Diagnosis  | 0                 | 0                 |
| DG63   | ICD-10 - Disease Classification | Polyneuropathy                                     | Peripheral nerves/vessels | Diagnosis  | 1                 | 0                 |
| DG632  | ICD-10 - Disease Classification | Diabetes with neurological complication/neuropathy | Peripheral nerves/vessels | Diagnosis  | 1                 | 0                 |
| DH280  | ICD-10 - Disease Classification | Diabetes with eye complications                    | Eyes                      | Diagnosis  | 1                 | 0                 |



| Code   | Code category                   | Code label                                 | Clinical domain | Code Group | Micro-angio-pathy | Macro-angio-pathy |
|--------|---------------------------------|--------------------------------------------|-----------------|------------|-------------------|-------------------|
| DH334  | ICD-10 - Disease Classification | Diseases of the retina, severe             | Eyes            | Diagnosis  | 1                 | 0                 |
| DH334A | ICD-10 - Disease Classification | Diseases of the retina, severe             | Eyes            | Diagnosis  | 1                 | 0                 |
| DH334B | ICD-10 - Disease Classification | Diseases of the retina, severe             | Eyes            | Diagnosis  | 1                 | 0                 |
| DH350  | ICD-10 - Disease Classification | Diseases of the retina, moderate           | Eyes            | Diagnosis  | 1                 | 0                 |
| DH350A | ICD-10 - Disease Classification | Diseases of the retina, moderate           | Eyes            | Diagnosis  | 1                 | 0                 |
| DH350C | ICD-10 - Disease Classification | Diseases of the retina, moderate           | Eyes            | Diagnosis  | 1                 | 0                 |
| DH350D | ICD-10 - Disease Classification | Diseases of the retina, severe             | Eyes            | Diagnosis  | 1                 | 0                 |
| DH350F | ICD-10 - Disease Classification | Diseases of the retina, moderate           | Eyes            | Diagnosis  | 1                 | 0                 |
| DH350I | ICD-10 - Disease Classification | Diseases of the retina, moderate           | Eyes            | Diagnosis  | 1                 | 0                 |
| DH352  | ICD-10 - Disease Classification | Diseases of the retina, severe             | Eyes            | Diagnosis  | 1                 | 0                 |
| DH352A | ICD-10 - Disease Classification | Diseases of the retina, severe             | Eyes            | Diagnosis  | 1                 | 0                 |
| DH353  | ICD-10 - Disease Classification | Diseases of the retina, severe             | Eyes            | Diagnosis  | 1                 | 0                 |
| DH353A | ICD-10 - Disease Classification | Diseases of the retina, severe             | Eyes            | Diagnosis  | 1                 | 0                 |
| DH353B | ICD-10 - Disease Classification | Diseases of the retina, severe             | Eyes            | Diagnosis  | 1                 | 0                 |
| DH353C | ICD-10 - Disease Classification | Diseases of the retina, severe             | Eyes            | Diagnosis  | 1                 | 0                 |
| DH353D | ICD-10 - Disease Classification | Diseases of the retina, severe             | Eyes            | Diagnosis  | 1                 | 0                 |
| DH353E | ICD-10 - Disease Classification | Diseases of the retina, severe             | Eyes            | Diagnosis  | 1                 | 0                 |
| DH360  | ICD-10 - Disease Classification | Diabetes with eye complications            | Eyes            | Diagnosis  | 1                 | 0                 |
| DH360A | ICD-10 - Disease Classification | Diabetes with eye complications            | Eyes            | Diagnosis  | 1                 | 0                 |
| DH360B | ICD-10 - Disease Classification | Diabetes with eye complications            | Eyes            | Diagnosis  | 1                 | 0                 |
| DH360C | ICD-10 - Disease Classification | Diabetes with eye complications            | Eyes            | Diagnosis  | 1                 | 0                 |
| DH360D | ICD-10 - Disease Classification | Diabetes with eye complications            | Eyes            | Diagnosis  | 1                 | 0                 |
| DH360E | ICD-10 - Disease Classification | Diabetes with eye complications            | Eyes            | Diagnosis  | 1                 | 0                 |
| DH360F | ICD-10 - Disease Classification | Diabetes with eye complications            | Eyes            | Diagnosis  | 1                 | 0                 |
| DH360H | ICD-10 - Disease Classification | Diabetes with eye complications            | Eyes            | Diagnosis  | 1                 | 0                 |
| DH360J | ICD-10 - Disease Classification | Diabetes with eye complications            | Eyes            | Diagnosis  | 1                 | 0                 |
| DH360K | ICD-10 - Disease Classification | Diabetes with eye complications            | Eyes            | Diagnosis  | 1                 | 0                 |
| DH450  | ICD-10 - Disease Classification | Diseases of the lens                       | Eyes            | Diagnosis  | 1                 | 0                 |
| DH540  | ICD-10 - Disease Classification | Blindness                                  | Eyes            | Diagnosis  | 1                 | 0                 |
| DH541  | ICD-10 - Disease Classification | Blindness                                  | Eyes            | Diagnosis  | 1                 | 0                 |
| DH542  | ICD-10 - Disease Classification | Reduced visual acuity                      | Eyes            | Diagnosis  | 1                 | 0                 |
| DH544  | ICD-10 - Disease Classification | Blindness                                  | Eyes            | Diagnosis  | 1                 | 0                 |
| DH545  | ICD-10 - Disease Classification | Blindness                                  | Eyes            | Diagnosis  | 1                 | 0                 |
| DH546  | ICD-10 - Disease Classification | Reduced visual acuity                      | Eyes            | Diagnosis  | 1                 | 0                 |
| DI21   | ICD-10 - Disease Classification | Myocardial infarction, no compl. Indicated | Heart           | Diagnosis  | 0                 | 1                 |
| DI210  | ICD-10 - Disease Classification | Myocardial infarction, no compl. Indicated | Heart           | Diagnosis  | 0                 | 1                 |
| DI210A | ICD-10 - Disease Classification | Myocardial infarction, no compl. Indicated | Heart           | Diagnosis  | 0                 | 1                 |
| DI210B | ICD-10 - Disease Classification | Myocardial infarction, no compl. Indicated | Heart           | Diagnosis  | 0                 | 1                 |
| DI211  | ICD-10 - Disease Classification | Myocardial infarction, no compl. Indicated | Heart           | Diagnosis  | 0                 | 1                 |
| DI211A | ICD-10 - Disease Classification | Myocardial infarction, no compl. Indicated | Heart           | Diagnosis  | 0                 | 1                 |
| DI211B | ICD-10 - Disease Classification | Myocardial infarction, no compl. Indicated | Heart           | Diagnosis  | 0                 | 1                 |
| DI212  | ICD-10 - Disease Classification | Myocardial infarction, no compl. Indicated | Heart           | Diagnosis  | 0                 | 1                 |
| DI212A | ICD-10 - Disease Classification | Myocardial infarction, no compl. Indicated | Heart           | Diagnosis  | 0                 | 1                 |
| DI212B | ICD-10 - Disease Classification | Myocardial infarction, no compl. Indicated | Heart           | Diagnosis  | 0                 | 1                 |
| DI212C | ICD-10 - Disease Classification | Myocardial infarction, no compl. Indicated | Heart           | Diagnosis  | 0                 | 1                 |
| DI212D | ICD-10 - Disease Classification | Myocardial infarction, no compl. Indicated | Heart           | Diagnosis  | 0                 | 1                 |
| DI212E | ICD-10 - Disease Classification | Myocardial infarction, no compl. Indicated | Heart           | Diagnosis  | 0                 | 1                 |
| DI212F | ICD-10 - Disease Classification | Myocardial infarction, no compl. Indicated | Heart           | Diagnosis  | 0                 | 1                 |
| DI212G | ICD-10 - Disease Classification | Myocardial infarction, no compl. Indicated | Heart           | Diagnosis  | 0                 | 1                 |
| DI212H | ICD-10 - Disease Classification | Myocardial infarction, no compl. Indicated | Heart           | Diagnosis  | 0                 | 1                 |



| Code   | Code category                   | Code label                                 | Clinical domain | Code Group | Micro-angio-pathy | Macro-angio-pathy |
|--------|---------------------------------|--------------------------------------------|-----------------|------------|-------------------|-------------------|
| DI252B | ICD-10 - Disease Classification | Myocardial infarction, no compl. Indicated | Heart           | Diagnosis  | 0                 | 1                 |
| DI252C | ICD-10 - Disease Classification | Myocardial infarction, no compl. Indicated | Heart           | Diagnosis  | 0                 | 1                 |
| DI50   | ICD-10 - Disease Classification | Heart failure                              | Heart           | Diagnosis  | 0                 | 1                 |
| DI500  | ICD-10 - Disease Classification | Heart failure                              | Heart           | Diagnosis  | 0                 | 1                 |
| DI500A | ICD-10 - Disease Classification | Heart failure                              | Heart           | Diagnosis  | 0                 | 1                 |
| DI501  | ICD-10 - Disease Classification | Heart failure                              | Heart           | Diagnosis  | 0                 | 1                 |
| DI501A | ICD-10 - Disease Classification | Heart failure                              | Heart           | Diagnosis  | 0                 | 1                 |
| DI501B | ICD-10 - Disease Classification | Heart failure                              | Heart           | Diagnosis  | 0                 | 1                 |
| DI501C | ICD-10 - Disease Classification | Heart failure                              | Heart           | Diagnosis  | 0                 | 1                 |
| DI501D | ICD-10 - Disease Classification | Heart failure                              | Heart           | Diagnosis  | 0                 | 1                 |
| DI502  | ICD-10 - Disease Classification | Heart failure                              | Heart           | Diagnosis  | 0                 | 1                 |
| DI503  | ICD-10 - Disease Classification | Heart failure                              | Heart           | Diagnosis  | 0                 | 1                 |
| DI508  | ICD-10 - Disease Classification | Heart failure                              | Heart           | Diagnosis  | 0                 | 1                 |
| DI508A | ICD-10 - Disease Classification | Heart failure                              | Heart           | Diagnosis  | 0                 | 1                 |
| DI509  | ICD-10 - Disease Classification | Heart failure                              | Heart           | Diagnosis  | 0                 | 1                 |
| DI509A | ICD-10 - Disease Classification | Heart failure                              | Heart           | Diagnosis  | 0                 | 1                 |
| DI509B | ICD-10 - Disease Classification | Heart failure                              | Heart           | Diagnosis  | 0                 | 1                 |
| DI61   | ICD-10 - Disease Classification | Intracerebral haemorrhage                  | CNS             | Diagnosis  | 0                 | 1                 |
| DI610  | ICD-10 - Disease Classification | Intracerebral haemorrhage                  | CNS             | Diagnosis  | 0                 | 1                 |
| DI610A | ICD-10 - Disease Classification | Intracerebral haemorrhage                  | CNS             | Diagnosis  | 0                 | 1                 |
| DI611  | ICD-10 - Disease Classification | Intracerebral haemorrhage                  | CNS             | Diagnosis  | 0                 | 1                 |
| DI611A | ICD-10 - Disease Classification | Intracerebral haemorrhage                  | CNS             | Diagnosis  | 0                 | 1                 |
| DI611B | ICD-10 - Disease Classification | Intracerebral haemorrhage                  | CNS             | Diagnosis  | 0                 | 1                 |
| DI612  | ICD-10 - Disease Classification | Intracerebral haemorrhage                  | CNS             | Diagnosis  | 0                 | 1                 |
| DI613  | ICD-10 - Disease Classification | Intracerebral haemorrhage                  | CNS             | Diagnosis  | 0                 | 1                 |
| DI614  | ICD-10 - Disease Classification | Intracerebral haemorrhage                  | CNS             | Diagnosis  | 0                 | 1                 |
| DI615  | ICD-10 - Disease Classification | Intracerebral haemorrhage                  | CNS             | Diagnosis  | 0                 | 1                 |
| DI616  | ICD-10 - Disease Classification | Intracerebral haemorrhage                  | CNS             | Diagnosis  | 0                 | 1                 |
| DI618  | ICD-10 - Disease Classification | Intracerebral haemorrhage                  | CNS             | Diagnosis  | 0                 | 1                 |
| DI619  | ICD-10 - Disease Classification | Intracerebral haemorrhage                  | CNS             | Diagnosis  | 0                 | 1                 |
| DI62   | ICD-10 - Disease Classification | Intracerebral haemorrhage                  | CNS             | Diagnosis  | 0                 | 1                 |
| DI620  | ICD-10 - Disease Classification | Intracerebral haemorrhage                  | CNS             | Diagnosis  | 0                 | 1                 |
| DI621  | ICD-10 - Disease Classification | Intracerebral haemorrhage                  | CNS             | Diagnosis  | 0                 | 1                 |
| DI629  | ICD-10 - Disease Classification | Intracerebral haemorrhage                  | CNS             | Diagnosis  | 0                 | 1                 |
| DI63   | ICD-10 - Disease Classification | Stroke                                     | CNS             | Diagnosis  | 0                 | 1                 |
| DI630  | ICD-10 - Disease Classification | Stroke                                     | CNS             | Diagnosis  | 0                 | 1                 |
| DI631  | ICD-10 - Disease Classification | Stroke                                     | CNS             | Diagnosis  | 0                 | 1                 |
| DI632  | ICD-10 - Disease Classification | Stroke                                     | CNS             | Diagnosis  | 0                 | 1                 |
| DI633  | ICD-10 - Disease Classification | Stroke                                     | CNS             | Diagnosis  | 0                 | 1                 |
| DI634  | ICD-10 - Disease Classification | Stroke                                     | CNS             | Diagnosis  | 0                 | 1                 |
| DI634A | ICD-10 - Disease Classification | Stroke                                     | CNS             | Diagnosis  | 0                 | 1                 |
| DI635  | ICD-10 - Disease Classification | Stroke                                     | CNS             | Diagnosis  | 0                 | 1                 |
| DI636  | ICD-10 - Disease Classification | Stroke                                     | CNS             | Diagnosis  | 0                 | 1                 |
| DI638  | ICD-10 - Disease Classification | Stroke                                     | CNS             | Diagnosis  | 0                 | 1                 |
| DI639  | ICD-10 - Disease Classification | Stroke                                     | CNS             | Diagnosis  | 0                 | 1                 |
| DI64   | ICD-10 - Disease Classification | Stroke                                     | CNS             | Diagnosis  | 0                 | 1                 |
| DI649  | ICD-10 - Disease Classification | Stroke                                     | CNS             | Diagnosis  | 0                 | 1                 |
| DI65   | ICD-10 - Disease Classification | CNS arterial occlusion                     | CNS             | Diagnosis  | 0                 | 1                 |
| DI650  | ICD-10 - Disease Classification | CNS arterial occlusion                     | CNS             | Diagnosis  | 0                 | 1                 |
| DI650A | ICD-10 - Disease Classification | CNS arterial occlusion                     | CNS             | Diagnosis  | 0                 | 1                 |

| Code   | Code category                   | Code label                                   | Clinical domain | Code Group | Micro-angio-pathy | Macro-angio-pathy |
|--------|---------------------------------|----------------------------------------------|-----------------|------------|-------------------|-------------------|
| DI650B | ICD-10 - Disease Classification | CNS arterial occlusion                       | CNS             | Diagnosis  | 0                 | 1                 |
| DI651  | ICD-10 - Disease Classification | CNS arterial occlusion                       | CNS             | Diagnosis  | 0                 | 1                 |
| DI651A | ICD-10 - Disease Classification | CNS arterial occlusion                       | CNS             | Diagnosis  | 0                 | 1                 |
| DI651B | ICD-10 - Disease Classification | CNS arterial occlusion                       | CNS             | Diagnosis  | 0                 | 1                 |
| DI652  | ICD-10 - Disease Classification | CNS arterial occlusion                       | CNS             | Diagnosis  | 0                 | 1                 |
| DI652A | ICD-10 - Disease Classification | CNS arterial occlusion                       | CNS             | Diagnosis  | 0                 | 1                 |
| DI652B | ICD-10 - Disease Classification | CNS arterial occlusion                       | CNS             | Diagnosis  | 0                 | 1                 |
| DI653  | ICD-10 - Disease Classification | CNS arterial occlusion                       | CNS             | Diagnosis  | 0                 | 1                 |
| DI653A | ICD-10 - Disease Classification | CNS arterial occlusion                       | CNS             | Diagnosis  | 0                 | 1                 |
| DI653B | ICD-10 - Disease Classification | CNS arterial occlusion                       | CNS             | Diagnosis  | 0                 | 1                 |
| DI653C | ICD-10 - Disease Classification | CNS arterial occlusion                       | CNS             | Diagnosis  | 0                 | 1                 |
| DI653D | ICD-10 - Disease Classification | CNS arterial occlusion                       | CNS             | Diagnosis  | 0                 | 1                 |
| DI658  | ICD-10 - Disease Classification | CNS arterial occlusion                       | CNS             | Diagnosis  | 0                 | 1                 |
| DI659  | ICD-10 - Disease Classification | CNS arterial occlusion                       | CNS             | Diagnosis  | 0                 | 1                 |
| DI66   | ICD-10 - Disease Classification | CNS arterial occlusion                       | CNS             | Diagnosis  | 0                 | 1                 |
| DI660  | ICD-10 - Disease Classification | CNS arterial occlusion                       | CNS             | Diagnosis  | 0                 | 1                 |
| DI660A | ICD-10 - Disease Classification | CNS arterial occlusion                       | CNS             | Diagnosis  | 0                 | 1                 |
| DI660B | ICD-10 - Disease Classification | CNS arterial occlusion                       | CNS             | Diagnosis  | 0                 | 1                 |
| DI661  | ICD-10 - Disease Classification | CNS arterial occlusion                       | CNS             | Diagnosis  | 0                 | 1                 |
| DI661A | ICD-10 - Disease Classification | CNS arterial occlusion                       | CNS             | Diagnosis  | 0                 | 1                 |
| DI661B | ICD-10 - Disease Classification | CNS arterial occlusion                       | CNS             | Diagnosis  | 0                 | 1                 |
| DI662  | ICD-10 - Disease Classification | CNS arterial occlusion                       | CNS             | Diagnosis  | 0                 | 1                 |
| DI662A | ICD-10 - Disease Classification | CNS arterial occlusion                       | CNS             | Diagnosis  | 0                 | 1                 |
| DI662B | ICD-10 - Disease Classification | CNS arterial occlusion                       | CNS             | Diagnosis  | 0                 | 1                 |
| DI663  | ICD-10 - Disease Classification | CNS arterial occlusion                       | CNS             | Diagnosis  | 0                 | 1                 |
| DI663A | ICD-10 - Disease Classification | CNS arterial occlusion                       | CNS             | Diagnosis  | 0                 | 1                 |
| DI663B | ICD-10 - Disease Classification | CNS arterial occlusion                       | CNS             | Diagnosis  | 0                 | 1                 |
| DI664  | ICD-10 - Disease Classification | CNS arterial occlusion                       | CNS             | Diagnosis  | 0                 | 1                 |
| DI664A | ICD-10 - Disease Classification | CNS arterial occlusion                       | CNS             | Diagnosis  | 0                 | 1                 |
| DI664B | ICD-10 - Disease Classification | CNS arterial occlusion                       | CNS             | Diagnosis  | 0                 | 1                 |
| DI664C | ICD-10 - Disease Classification | CNS arterial occlusion                       | CNS             | Diagnosis  | 0                 | 1                 |
| DI664D | ICD-10 - Disease Classification | CNS arterial occlusion                       | CNS             | Diagnosis  | 0                 | 1                 |
| DI668  | ICD-10 - Disease Classification | CNS arterial occlusion                       | CNS             | Diagnosis  | 0                 | 1                 |
| DI668A | ICD-10 - Disease Classification | CNS arterial occlusion                       | CNS             | Diagnosis  | 0                 | 1                 |
| DI669  | ICD-10 - Disease Classification | CNS arterial occlusion                       | CNS             | Diagnosis  | 0                 | 1                 |
| DI69   | ICD-10 - Disease Classification | Intracerebral haemorrhage                    | CNS             | Diagnosis  | 0                 | 1                 |
| DI690  | ICD-10 - Disease Classification | Intracerebral haemorrhage                    | CNS             | Diagnosis  | 0                 | 1                 |
| DI691  | ICD-10 - Disease Classification | Intracerebral haemorrhage                    | CNS             | Diagnosis  | 0                 | 1                 |
| DI692  | ICD-10 - Disease Classification | Intracerebral haemorrhage                    | CNS             | Diagnosis  | 0                 | 1                 |
| DI693  | ICD-10 - Disease Classification | Stroke                                       | CNS             | Diagnosis  | 0                 | 1                 |
| DI694  | ICD-10 - Disease Classification | Stroke                                       | CNS             | Diagnosis  | 0                 | 1                 |
| DI698  | ICD-10 - Disease Classification | Stroke                                       | CNS             | Diagnosis  | 0                 | 1                 |
| DN08   | ICD-10 - Disease Classification | Nephropathy                                  | Kidneys         | Diagnosis  | 1                 | 0                 |
| DN083  | ICD-10 - Disease Classification | Diabetes with renal complication/nephropathy | Kidneys         | Diagnosis  | 1                 | 0                 |
| DN088  | ICD-10 - Disease Classification | Nephropathy                                  | Kidneys         | Diagnosis  | 1                 | 0                 |
| DN18   | ICD-10 - Disease Classification | Nephropathy                                  | Kidneys         | Diagnosis  | 1                 | 0                 |
| DN180  | ICD-10 - Disease Classification | Uraemia                                      | Kidneys         | Diagnosis  | 1                 | 0                 |
| DN181  | ICD-10 - Disease Classification | Nephropathy                                  | Kidneys         | Diagnosis  | 1                 | 0                 |
| DN182  | ICD-10 - Disease Classification | Nephropathy                                  | Kidneys         | Diagnosis  | 1                 | 0                 |
| DN183  | ICD-10 - Disease Classification | Nephropathy                                  | Kidneys         | Diagnosis  | 1                 | 0                 |

| Code    | Code category                   | Code label                                    | Clinical domain | Code Group             | Micro-angio-pathy | Macro-angio-pathy |
|---------|---------------------------------|-----------------------------------------------|-----------------|------------------------|-------------------|-------------------|
| DN184   | ICD-10 - Disease Classification | Nephropathy                                   | Kidneys         | Diagnosis              | 1                 | 0                 |
| DN185   | ICD-10 - Disease Classification | Uraemia                                       | Kidneys         | Diagnosis              | 1                 | 0                 |
| DN188   | ICD-10 - Disease Classification | Nephropathy                                   | Kidneys         | Diagnosis              | 1                 | 0                 |
| DN189   | ICD-10 - Disease Classification | Nephropathy                                   | Kidneys         | Diagnosis              | 1                 | 0                 |
| DN19    | ICD-10 - Disease Classification | Nephropathy                                   | Kidneys         | Diagnosis              | 1                 | 0                 |
| DN199   | ICD-10 - Disease Classification | Nephropathy                                   | Kidneys         | Diagnosis              | 1                 | 0                 |
| DO240   | ICD-10 - Disease Classification | Pre-existing diabetes in pregnancy/childbirth | DMgeneral       | Diagnosis              | 0                 | 0                 |
| DO240A  | ICD-10 - Disease Classification | Pre-existing diabetes in pregnancy/childbirth | DMgeneral       | Diagnosis              | 0                 | 0                 |
| DO240B  | ICD-10 - Disease Classification | Pre-existing diabetes in pregnancy/childbirth | DMgeneral       | Diagnosis              | 0                 | 0                 |
| DO240C  | ICD-10 - Disease Classification | Pre-existing diabetes in pregnancy/childbirth | DMgeneral       | Diagnosis              | 0                 | 0                 |
| DO241   | ICD-10 - Disease Classification | Pre-existing diabetes in pregnancy/childbirth | DMgeneral       | Diagnosis              | 0                 | 0                 |
| DO241A  | ICD-10 - Disease Classification | Pre-existing diabetes in pregnancy/childbirth | DMgeneral       | Diagnosis              | 0                 | 0                 |
| DO241B  | ICD-10 - Disease Classification | Pre-existing diabetes in pregnancy/childbirth | DMgeneral       | Diagnosis              | 0                 | 0                 |
| DO241C  | ICD-10 - Disease Classification | Pre-existing diabetes in pregnancy/childbirth | DMgeneral       | Diagnosis              | 0                 | 0                 |
| DO242   | ICD-10 - Disease Classification | Pre-existing diabetes in pregnancy/childbirth | DMgeneral       | Diagnosis              | 0                 | 0                 |
| DO242A  | ICD-10 - Disease Classification | Pre-existing diabetes in pregnancy/childbirth | DMgeneral       | Diagnosis              | 0                 | 0                 |
| DO242B  | ICD-10 - Disease Classification | Pre-existing diabetes in pregnancy/childbirth | DMgeneral       | Diagnosis              | 0                 | 0                 |
| DO242C  | ICD-10 - Disease Classification | Pre-existing diabetes in pregnancy/childbirth | DMgeneral       | Diagnosis              | 0                 | 0                 |
| DO243   | ICD-10 - Disease Classification | Pre-existing diabetes in pregnancy/childbirth | DMgeneral       | Diagnosis              | 0                 | 0                 |
| DO243A  | ICD-10 - Disease Classification | Pre-existing diabetes in pregnancy/childbirth | DMgeneral       | Diagnosis              | 0                 | 0                 |
| DO243B  | ICD-10 - Disease Classification | Pre-existing diabetes in pregnancy/childbirth | DMgeneral       | Diagnosis              | 0                 | 0                 |
| DO243C  | ICD-10 - Disease Classification | Pre-existing diabetes in pregnancy/childbirth | DMgeneral       | Diagnosis              | 0                 | 0                 |
| DZ135A1 | ICD-10 - Disease Classification | Screening for diabetic retinopathy            | DMgeneral       | Diagnosis              | 0                 | 0                 |
| DZ940   | ICD-10 - Disease Classification | Kidney transplantation                        | Kidneys         | Diagnosis              | 1                 | 0                 |
| DZ951   | ICD-10 - Disease Classification | Coronary bypass operation, CABG               | Heart           | Diagnosis              | 0                 | 1                 |
| DZ992   | ICD-10 - Disease Classification | Dialysis                                      | Kidneys         | Diagnosis              | 1                 | 0                 |
| KCKC10  | Danish surgery code since 1995  | Surgery for severe eye disease                | Eyes            | Surgical interventions | 1                 | 0                 |
| KCKC10A | Danish surgery code since 1995  | Surgery for severe eye disease                | Eyes            | Surgical interventions | 1                 | 0                 |
| KCKC10B | Danish surgery code since 1995  | Surgery for severe eye disease                | Eyes            | Surgical interventions | 1                 | 0                 |
| KCKC15  | Danish surgery code since 1995  | Surgery for severe eye disease                | Eyes            | Surgical interventions | 1                 | 0                 |
| KCKC15A | Danish surgery code since 1995  | Surgery for severe eye disease                | Eyes            | Surgical interventions | 1                 | 0                 |
| KCKC15B | Danish surgery code since 1995  | Surgery for severe eye disease                | Eyes            | Surgical interventions | 1                 | 0                 |
| KCKC20  | Danish surgery code since 1995  | Surgery for severe eye disease                | Eyes            | Surgical interventions | 1                 | 0                 |
| KCKC30  | Danish surgery code since 1995  | Surgery for severe eye disease                | Eyes            | Surgical interventions | 1                 | 0                 |
| KCKC40  | Danish surgery code since 1995  | Surgery for severe eye disease                | Eyes            | Surgical interventions | 1                 | 0                 |
| KCKC50  | Danish surgery code since 1995  | Surgery for severe eye disease                | Eyes            | Surgical interventions | 1                 | 0                 |
| KCKC60  | Danish surgery code since 1995  | Surgery for severe eye disease                | Eyes            | Surgical interventions | 0                 | 0                 |
| KCKC65  | Danish surgery code since 1995  | Surgery for severe eye disease                | Eyes            | Surgical interventions | 0                 | 0                 |
| KCKC70  | Danish surgery code since 1995  | Surgery for severe eye disease                | Eyes            | Surgical interventions | 0                 | 0                 |
| KCKC75  | Danish surgery code since 1995  | Surgery for severe eye disease                | Eyes            | Surgical interventions | 0                 | 0                 |
| KCKC99  | Danish surgery code since 1995  | Surgery for severe eye disease                | Eyes            | Surgical interventions | 0                 | 0                 |
| KCKD    | Danish surgery code since 1995  | Surgery for severe eye disease                | Eyes            | Surgical interventions | 1                 | 0                 |
| KCKD00  | Danish surgery code since 1995  | Surgery for severe eye disease                | Eyes            | Surgical interventions | 0                 | 0                 |
| KCKD05  | Danish surgery code since 1995  | Surgery for severe eye disease                | Eyes            | Surgical interventions | 1                 | 0                 |
| KCKD05A | Danish surgery code since 1995  | Surgery for severe eye disease                | Eyes            | Surgical interventions | 1                 | 0                 |
| KCKD05B | Danish surgery code since 1995  | Surgery for severe eye disease                | Eyes            | Surgical interventions | 1                 | 0                 |
| KCKD05C | Danish surgery code since 1995  | Surgery for severe eye disease                | Eyes            | Surgical interventions | 1                 | 0                 |
| KCKD10  | Danish surgery code since 1995  | Surgery for severe eye disease                | Eyes            | Surgical interventions | 0                 | 0                 |
| KCKD15  | Danish surgery code since 1995  | Surgery for severe eye disease                | Eyes            | Surgical interventions | 0                 | 0                 |
| KCKD20  | Danish surgery code since 1995  | Surgery for severe eye disease                | Eyes            | Surgical interventions | 0                 | 0                 |





| Code    | Code category                  | Code label                         | Clinical domain           | Code Group             | Micro-angio-pathy | Macro-angio-pathy |
|---------|--------------------------------|------------------------------------|---------------------------|------------------------|-------------------|-------------------|
| KNHQ16  | Danish surgery code since 1995 | Amputation at or below ankle level | Peripheral nerves/vessels | Surgical interventions | 1                 | 1                 |
| KNHQ17  | Danish surgery code since 1995 | Amputation at or below ankle level | Peripheral nerves/vessels | Surgical interventions | 1                 | 1                 |
| KNHQ2   | Danish surgery code since 1995 | Amputation at or below ankle level | Peripheral nerves/vessels | Surgical interventions | 1                 | 1                 |
| KNHQ20  | Danish surgery code since 1995 | Amputation at or below ankle level | Peripheral nerves/vessels | Surgical interventions | 1                 | 1                 |
| KNHQ21  | Danish surgery code since 1995 | Amputation at or below ankle level | Peripheral nerves/vessels | Surgical interventions | 1                 | 1                 |
| KNHQ22  | Danish surgery code since 1995 | Amputation at or below ankle level | Peripheral nerves/vessels | Surgical interventions | 1                 | 1                 |
| KNHQ23  | Danish surgery code since 1995 | Amputation at or below ankle level | Peripheral nerves/vessels | Surgical interventions | 1                 | 1                 |
| KNHQ24  | Danish surgery code since 1995 | Amputation at or below ankle level | Peripheral nerves/vessels | Surgical interventions | 1                 | 1                 |
| KNHQ25  | Danish surgery code since 1995 | Amputation at or below ankle level | Peripheral nerves/vessels | Surgical interventions | 1                 | 1                 |
| KNHQ27  | Danish surgery code since 1995 | Amputation at or below ankle level | Peripheral nerves/vessels | Surgical interventions | 1                 | 1                 |
| KNHQ90  | Danish surgery code since 1995 | Amputation at or below ankle level | Peripheral nerves/vessels | Surgical interventions | 1                 | 1                 |
| KNHQ91  | Danish surgery code since 1995 | Amputation at or below ankle level | Peripheral nerves/vessels | Surgical interventions | 1                 | 1                 |
| KNHQ92  | Danish surgery code since 1995 | Amputation at or below ankle level | Peripheral nerves/vessels | Surgical interventions | 1                 | 1                 |
| KNHQ93  | Danish surgery code since 1995 | Amputation at or below ankle level | Peripheral nerves/vessels | Surgical interventions | 1                 | 1                 |
| KNHQ94  | Danish surgery code since 1995 | Amputation at or below ankle level | Peripheral nerves/vessels | Surgical interventions | 1                 | 1                 |
| KNHQ95  | Danish surgery code since 1995 | Amputation at or below ankle level | Peripheral nerves/vessels | Surgical interventions | 1                 | 1                 |
| KNHQ96  | Danish surgery code since 1995 | Amputation at or below ankle level | Peripheral nerves/vessels | Surgical interventions | 1                 | 1                 |
| KNHQ97  | Danish surgery code since 1995 | Amputation at or below ankle level | Peripheral nerves/vessels | Surgical interventions | 1                 | 1                 |
| KNHQ98  | Danish surgery code since 1995 | Amputation at or below ankle level | Peripheral nerves/vessels | Surgical interventions | 1                 | 1                 |
| KNHQ99  | Danish surgery code since 1995 | Amputation at or below ankle level | Peripheral nerves/vessels | Surgical interventions | 1                 | 1                 |
| KQDB05  | Danish surgery code since 1995 | Surgery for ulcer of lower limb    | Peripheral nerves/vessels | Surgical interventions | 1                 | 0                 |
| KQDB10  | Danish surgery code since 1995 | Surgery for ulcer of lower limb    | Peripheral nerves/vessels | Surgical interventions | 1                 | 0                 |
| KQDB10A | Danish surgery code since 1995 | Surgery for ulcer of lower limb    | Peripheral nerves/vessels | Surgical interventions | 1                 | 0                 |
| KQDB30  | Danish surgery code since 1995 | Surgery for ulcer of lower limb    | Peripheral nerves/vessels | Surgical interventions | 1                 | 0                 |
| KQDB99  | Danish surgery code since 1995 | Surgery for ulcer of lower limb    | Peripheral nerves/vessels | Surgical interventions | 1                 | 0                 |
| KQDG20  | Danish surgery code since 1995 | Surgery for ulcer of lower limb    | Peripheral nerves/vessels | Surgical interventions | 1                 | 0                 |
| KQDG20A | Danish surgery code since 1995 | Surgery for ulcer of lower limb    | Peripheral nerves/vessels | Surgical interventions | 1                 | 0                 |
| KQDG30  | Danish surgery code since 1995 | Surgery for ulcer of lower limb    | Peripheral nerves/vessels | Surgical interventions | 1                 | 0                 |
| KQDG99  | Danish surgery code since 1995 | Surgery for ulcer of lower limb    | Peripheral nerves/vessels | Surgical interventions | 1                 | 0                 |



Supplementary Table S2 Sensitivity analysis (prevalence of micro- and macroangiopathic disease in individuals with diabetes)

|                                                                                               | n   | RRR  | (95% CI)    | p value |
|-----------------------------------------------------------------------------------------------|-----|------|-------------|---------|
| Adjusted model <sup>a</sup> individuals not in lipid lowering treatment (N=929)               |     |      |             |         |
| Only microangiopathy                                                                          | 117 | 1.20 | (1.03;1.39) | 0.018   |
| Only macroangiopathy                                                                          | 30  | 1.07 | (0.79;1.47) | 0.650   |
| Micro- & macroangiopathy                                                                      | 17  | 0.83 | (0.45;1.51) | 0.542   |
| Unspecified                                                                                   | 209 | 0.96 | (0.81;1.13) | 0.620   |
| Adjusted model <sup>b</sup> individuals in lipid lowering treatment (N=2,193)                 |     |      |             |         |
| Only microangiopathy                                                                          | 220 | 1.09 | (0.99;1.21) | 0.086   |
| Only macroangiopathy                                                                          | 222 | 0.72 | (0.58;0.91) | 0.005   |
| Micro- & macroangiopathy                                                                      | 90  | 1.07 | (0.93;1.24) | 0.334   |
| Unspecified                                                                                   | 606 | 1.07 | (0.98;1.18) | 0.134   |
| Adjusted model <sup>a</sup> individuals not in vitamin K antagonist treatment (N=2,975)       |     |      |             |         |
| Only microangiopathy                                                                          | 330 | 1.11 | (1.02;1.20) | 0.014   |
| Only macroangiopathy                                                                          | 231 | 0.79 | (0.65;0.97) | 0.022   |
| Micro- & macroangiopathy                                                                      | 90  | 1.06 | (0.92;1.23) | 0.406   |
| Unspecified                                                                                   | 758 | 1.07 | (0.99;1.15) | 0.086   |
| Adjusted model <sup>a</sup> individuals not in platelet inhibitor treatment (N=1,708)         |     |      |             |         |
| Only microangiopathy                                                                          | 198 | 1.11 | (1.00;1.23) | 0.055   |
| Only macroangiopathy                                                                          | 44  | 0.92 | (0.63;1.35) | 0.677   |
| Micro- & macroangiopathy                                                                      | 32  | 1.10 | (0.89;1.36) | 0.358   |
| Unspecified                                                                                   | 335 | 1.01 | (0.90;1.13) | 0.907   |
| Crude model adjusting for platelet inhibitor treatment (N=3,239)                              |     |      |             |         |
| Only microangiopathy                                                                          | 349 | 1.05 | (0.98;1.12) | 0.177   |
| Only macroangiopathy                                                                          | 263 | 0.89 | (0.77;1.03) | 0.122   |
| Micro- & macroangiopathy                                                                      | 109 | 1.05 | (0.95;1.14) | 0.336   |
| Unspecified                                                                                   | 858 | 1.03 | (0.97;1.09) | 0.302   |
| Crude model adjusting for platelet inhibitor treatment and interaction <sup>c</sup> (N=3,239) |     |      |             |         |
| Only microangiopathy                                                                          | 349 | 1.03 | (0.93;1.14) | 0.565   |
| Only macroangiopathy                                                                          | 263 | 0.89 | (0.65;1.23) | 0.490   |
| Micro- & macroangiopathy                                                                      | 109 | 1.10 | (0.94;1.30) | 0.234   |
| Unspecified                                                                                   | 858 | 0.95 | (0.86;1.06) | 0.377   |

<sup>a</sup>Adjusted for age at enrollment, BMI, HbA1c, systolic blood pressure, LDL, triglycerides, eGFR, waist-hip-ratio (within/above recommendations), gender, smoking status, alcohol (within/above recommendations), exercise, lipid lowering drugs, platelet inhibitor treatment, vitamin K antagonist treatment, comorbidity index (malabsorption).

<sup>b</sup>Adjusted the same way as the other models except the comorbidity index (malabsorption) has been left out due to too little variation in this variable when only in lipid lowering treatment is included. Here only 2 persons score 1 in the index.

<sup>c</sup>Interaction between vitamin K1 and platelet inhibitor treatment. n/N, number of cases/total number.

Supplementary Table S3 Sensitivity analysis (prevalence of micro- and macroangiopathic disease in individuals without diabetes)

|                                                                                               | n   | RRR  | (95% CI)    | p value |
|-----------------------------------------------------------------------------------------------|-----|------|-------------|---------|
| Adjusted model <sup>a</sup> individuals not in lipid lowering treatment (N=3,110)             |     |      |             |         |
| Only microangiopathy                                                                          | 88  | 1.06 | (0.92;1.22) | 0.400   |
| Only macroangiopathy                                                                          | 93  | 1.11 | (0.97;1.26) | 0.124   |
| Micro- & macroangiopathy                                                                      | 10  | 0.42 | (0.10;1.85) | 0.253   |
| Adjusted model <sup>b</sup> individuals in lipid lowering treatment (N=589)                   |     |      |             |         |
| Only microangiopathy                                                                          | 23  | 1.65 | (1.05;2.59) | 0.028   |
| Only macroangiopathy                                                                          | 164 | 0.97 | (0.71;1.32) | 0.829   |
| Micro- & macroangiopathy                                                                      | 17  | 0.91 | (0.43;1.90) | 0.792   |
| Adjusted model <sup>b</sup> individuals not in vitamin K antagonist treatment (N=3,638)       |     |      |             |         |
| Only microangiopathy                                                                          | 107 | 1.05 | (0.95;1.17) | 0.342   |
| Only macroangiopathy                                                                          | 238 | 1.08 | (0.99;1.19) | 0.099   |
| Micro- & macroangiopathy                                                                      | 26  | 0.79 | (0.41;1.51) | 0.472   |
| Adjusted model <sup>a</sup> individuals not in platelet inhibitor treatment (N=3,289)         |     |      |             |         |
| Only microangiopathy                                                                          | 86  | 1.10 | (0.95;1.28) | 0.209   |
| Only macroangiopathy                                                                          | 76  | 1.15 | (0.99;1.34) | 0.060   |
| Micro- & macroangiopathy                                                                      | 13  | 0.44 | (0.13;1.50) | 0.189   |
| Crude model adjusting for platelet inhibitor treatment (N=3,808)                              |     |      |             |         |
| Only microangiopathy                                                                          | 113 | 1.05 | (0.96;1.16) | 0.298   |
| Only macroangiopathy                                                                          | 262 | 1.08 | (1.00;1.17) | 0.063   |
| Micro- & macroangiopathy                                                                      | 29  | 0.67 | (0.35;1.28) | 0.223   |
| Crude model adjusting for platelet inhibitor treatment and interaction <sup>c</sup> (N=3,808) |     |      |             |         |
| Only microangiopathy                                                                          | 113 | 1.07 | (0.94;1.23) | 0.297   |
| Only macroangiopathy                                                                          | 262 | 1.12 | (0.99;1.28) | 0.080   |
| Micro- & macroangiopathy                                                                      | 29  | 0.40 | (0.13;1.26) | 0.118   |

<sup>a</sup>Adjusted for age at enrollment, BMI, HbA1c, systolic blood pressure, LDL, triglycerides, eGFR, waist-hip-ratio (within/above recommendations), gender, smoking status, alcohol (within/above recommendations), exercise, lipid lowering drugs, platelet inhibitor treatment, vitamin K antagonist treatment, comorbidity index (malabsorption).

<sup>b</sup>Adjusted the same way as the other models except the comorbidity index (malabsorption) has been left out due to too little variation in this variable when only in lipid lowering treatment is included. Here only 2 persons score 1 in the index.

<sup>c</sup>Interaction between vitamin K1 and platelet inhibitor treatment. n/N, number of cases/total number.

[1] Green A, Sortso C, Jensen PB, Emneus M (2015) Incidence, morbidity, mortality, and prevalence of diabetes in Denmark, 2000-2011: results from the Diabetes Impact Study 2013. *Clin Epidemiol* 7: 421-430. 10.2147/CLEP.S88577
